# Supplementary material
Source: MDPI journal article supplement (https://www.mdpi.com/2071-1050/9/10/1694)
Supplement: s1 [file s1]

**Table S1.** T-test for equality of means.

|                            |                   | t      | df      | Sig. (2-tailed) | Mean Difference | Std. Error Difference | 95% Confidence Interval of the Difference |          |
|----------------------------|-------------------|--------|---------|-----------------|-----------------|-----------------------|-------------------------------------------|----------|
|                            |                   |        |         |                 |                 |                       | Lower                                     | Upper    |
| Regulatory focus_mean      | Eva <sup>a</sup>  | 9.109  | 671     | 0.000           | 0.24781         | 0.02720               | 0.19439                                   | 0.30122  |
|                            | Evna <sup>b</sup> | 9.117  | 651.468 | 0.000           | 0.24781         | 0.02718               | 0.19443                                   | 0.30118  |
| Regulatory_promotion_mean  | Eva               | 1.452  | 677     | 0.147           | 0.04534         | 0.03122               | -0.01597                                  | 0.10664  |
|                            | Evna              | 1.453  | 653.238 | 0.147           | 0.04534         | 0.03120               | -0.01592                                  | 0.10659  |
| Regulatory_prevention_mean | Eva               | 9.882  | 677     | 0.000           | 2.45476         | 0.24841               | 1.96701                                   | 2.94251  |
|                            | Evna              | 9.871  | 633.858 | 0.000           | 2.45476         | 0.24869               | 1.96641                                   | 2.94312  |
| Future time_mean           | Eva               | 15.345 | 679     | 0.000           | 0.68560         | 0.04468               | 0.59787                                   | 0.77332  |
|                            | Evna              | 15.318 | 638.326 | 0.000           | 0.68560         | 0.04476               | 0.59771                                   | 0.77349  |
| Eco-awareness_mean         | Eva               | 3.121  | 676     | 0.002           | 0.16671         | 0.05342               | 0.06181                                   | 0.27160  |
|                            | Evna              | 3.123  | 623.353 | 0.002           | 0.16671         | 0.05338               | 0.06189                                   | 0.27153  |
| Eco-responsibility_mean    | Eva               | 0.136  | 677     | 0.892           | 0.00711         | 0.05231               | -0.09560                                  | 0.10981  |
|                            | Evna              | 0.136  | 630.327 | 0.892           | 0.00711         | 0.05224               | -0.09548                                  | 0.10970  |
| Eco-behaviour_mean         | Eva               | -3.144 | 631     | 0.002           | -0.14058        | 0.04471               | -0.22837                                  | -0.05279 |
|                            | Evna              | -3.141 | 624.511 | 0.002           | -0.14058        | 0.04476               | -0.22848                                  | -0.05268 |
| Greenopinion_mean          | Eva               | 9.243  | 675     | 0.000           | 0.40850         | 0.04419               | 0.32173                                   | 0.49528  |
|                            | Evna              | 9.241  | 663.922 | 0.000           | 0.40850         | 0.04420               | 0.32171                                   | 0.49530  |

a. Equal variance assumed

b. Equal variances not assumed
